# Supplementary material for: A theoretical study on the formation of EX4+ and E2X5+(E = P, As; X = Br, I) from Ag+ and EX3/X2
Source: Royal Society of Chemistry journal article supplement (doi:10.1039/b503088a), 2005-01-01
Supplement: b503088a.pdf [file b503088a.pdf]

**How are  $\text{PX}_4^+$ ,  $\text{P}_2\text{X}_5^+$  and  $\text{AsBr}_4^+$  Formed? Why didn't we Succeed  
to Prepare  $\text{AsI}_4^+$ ? A Theoretical Study.**

by

M. Gonsior, I. Krossing\*

<sup>a)</sup> M.Sc. Marcin Gonsior, Universität Karlsruhe, Institut für Anorganische Chemie,  
Engesserstr. Geb. 30.45, 76128 Karlsruhe, e-mail: gonsior@chemie.uni-karlsruhe.de

<sup>b)</sup> Prof. Ingo Krossing, Ecole Polytechnique Fédérale de Lausanne (EPFL), Laboratory of  
Inorganic and Coordination Chemistry (LCIC), ISIC-BCH, 1015 Lausanne, Switzerland, e-  
mail: ingo.krossing@epfl.ch

## Computed Total Energies of all Species

Tab. A. Total energy, zero point energy, solvation energy and thermal and entropic contributions at 298K to the free energy of all calculated species in [H] (at MP2/TZVPP level).

| Molecule (symmetry)                                                                          | $U$<br>(MP2/TZVPP) | ZPE<br>(MP2/TZVPP) | $H_{solv}(BP86/SVP)$<br>COSMO | Thermal+Entropic<br>correc. to G at 298K |
|----------------------------------------------------------------------------------------------|--------------------|--------------------|-------------------------------|------------------------------------------|
| AsBr <sub>2</sub> <sup>+</sup> (C <sub>2v</sub> )                                            | -7379.34087        | 0.00197            | -0.08149                      | -0.02874                                 |
| AsI <sub>2</sub> <sup>+</sup> (C <sub>2v</sub> )                                             | -2256.84173        | 0.00158            | -0.07563                      | -0.03070                                 |
| PBr <sub>2</sub> <sup>+</sup> (C <sub>2v</sub> )                                             | -5485.74848        | 0.00264            | -0.07953                      | -0.02701                                 |
| PI <sub>2</sub> <sup>+</sup> (C <sub>2v</sub> )                                              | -363.24680         | 0.00221            | -0.07384                      | -0.02902                                 |
| AsBr <sub>4</sub> <sup>+</sup> (T <sub>d</sub> )                                             | -12524.56758       | 0.00444            | -0.06447                      | -0.03171                                 |
| AsI <sub>4</sub> <sup>+</sup> (T <sub>d</sub> )                                              | -2279.56412        | 0.00335            | -0.06262                      | -0.03606                                 |
| PBr <sub>4</sub> <sup>+</sup> (T <sub>d</sub> )                                              | -10630.99836       | 0.00574            | -0.06472                      | -0.02926                                 |
| PI <sub>4</sub> <sup>+</sup> (T <sub>d</sub> )                                               | -385.98251         | 0.00444            | -0.06119                      | -0.03382                                 |
| As <sub>2</sub> Br <sub>5</sub> <sup>+</sup> (C <sub>s</sub> )                               | -17331.67684       | 0.00608            | -0.06210                      | -0.04104                                 |
| As <sub>2</sub> I <sub>5</sub> <sup>+</sup> (C <sub>s</sub> )                                | -4525.41879        | 0.00490            | -0.05905                      | -0.04589                                 |
| P <sub>2</sub> Br <sub>5</sub> <sup>+</sup> (C <sub>s</sub> )                                | -13544.51217       | 0.00830            | -0.06013                      | -0.03617                                 |
| P <sub>2</sub> I <sub>5</sub> <sup>+</sup> (C <sub>s</sub> )                                 | -738.24532         | 0.00686            | -0.05709                      | -0.04130                                 |
| AsBr <sub>3</sub> (C <sub>3v</sub> )                                                         | -9952.28126        | 0.00283            | -0.00353                      | -0.03156                                 |
| AsI <sub>3</sub> (C <sub>3v</sub> )                                                          | -2268.50920        | 0.00223            | -0.00407                      | -0.03460                                 |
| PBr <sub>3</sub> (C <sub>3v</sub> )                                                          | -8058.68874        | 0.00368            | -0.00188                      | -0.02972                                 |
| PI <sub>3</sub> (C <sub>3v</sub> )                                                           | -374.91413         | 0.00301            | -0.00281                      | -0.03386                                 |
| Br <sub>2</sub> (D <sub>∞h</sub> )                                                           | -5145.14283        | 0.00076            | -0.00165                      | -0.02236                                 |
| I <sub>2</sub> (D <sub>∞h</sub> )                                                            | -22.65132          | 0.00054            | -0.00256                      | -0.02593                                 |
| AgBr (C <sub>∞v</sub> )                                                                      | -2719.12161        | 0.00056            | -0.01338                      | -0.02495                                 |
| AgI (C <sub>∞v</sub> )                                                                       | -157.86742         | 0.00047            | -0.01270                      | -0.02580                                 |
| Ag(CH <sub>2</sub> Cl <sub>2</sub> ) <sub>3</sub> <sup>+</sup> (C <sub>2</sub> )             | -3022.16690        | 0.08808            | -0.06004                      | 0.02628                                  |
| CH <sub>2</sub> Cl <sub>2</sub> (C <sub>2v</sub> )                                           | -958.61384         | 0.02794            | -0.00404                      | 0.00621                                  |
| Ag(Br <sub>2</sub> AsBr) <sub>2</sub> <sup>+</sup> (C <sub>2</sub> )                         | -20050.87880       | 0.00658            | -0.06035                      | -0.05379                                 |
| Ag(I <sub>2</sub> AsI) <sub>2</sub> <sup>+</sup> (C <sub>2</sub> )                           | -4683.35030        | 0.00534            | -0.05675                      | -0.05920                                 |
| Ag(Br <sub>2</sub> PBr) <sub>2</sub> <sup>+</sup> (C <sub>2</sub> )                          | -16263.68695       | 0.00826            | -0.05923                      | -0.04980                                 |
| Ag(I <sub>2</sub> PI) <sub>2</sub> <sup>+</sup> (C <sub>2</sub> )                            | -896.15586         | 0.00687            | -0.05600                      | -0.05573                                 |
| (CH <sub>2</sub> Cl <sub>2</sub> )Ag(Br <sub>2</sub> AsBr) <sup>+</sup><br>(C <sub>s</sub> ) | -11057.20394       | 0.03400            | -0.06268                      | -0.02085                                 |
| (CH <sub>2</sub> Cl <sub>2</sub> )Ag(I <sub>2</sub> AsI) <sup>+</sup> (C <sub>s</sub> )      | -3373.44045        | 0.03331            | -0.06083                      | -0.02479                                 |
| (CH <sub>2</sub> Cl <sub>2</sub> )Ag(Br <sub>2</sub> PBr) <sup>+</sup> (C <sub>s</sub> )     | -9163.60810        | 0.03483            | -0.06253                      | -0.01915                                 |
| (CH <sub>2</sub> Cl <sub>2</sub> )Ag(I <sub>2</sub> PI) <sup>+</sup> (C <sub>s</sub> )       | -1479.84299        | 0.03413            | -0.06059                      | -0.02212                                 |

|                                                                                         |              |         |          |          |
|-----------------------------------------------------------------------------------------|--------------|---------|----------|----------|
| (BrAsBr <sub>2</sub> )Ag(Br <sub>2</sub> ) <sup>+</sup> (C <sub>1</sub> )               | -15243.72475 | 0.00459 | -0.06369 | -0.04852 |
| (IAsI <sub>2</sub> )Ag(I <sub>2</sub> ) <sup>+</sup> (C <sub>1</sub> )                  | -2437.47006  | 0.00370 | -0.06081 | -0.05215 |
| (BrPBr <sub>2</sub> )Ag(Br <sub>2</sub> ) <sup>+</sup> (C <sub>1</sub> )                | -13350.12867 | 0.00541 | -0.06336 | -0.04685 |
| (IPI <sub>2</sub> )Ag(I <sub>2</sub> ) <sup>+</sup> (C <sub>1</sub> )                   | -543.88327   | 0.00446 | -0.06041 | -0.05054 |
| (I <sub>3</sub> As)Ag(AsI <sub>3</sub> ) <sup>+</sup> (C <sub>2h</sub> )                | -4683.34179  | 0.00598 | -0.05619 | -0.05699 |
| (Br <sub>3</sub> As)Ag(AsBr <sub>3</sub> ) <sup>+</sup> (C <sub>2h</sub> )              | -20050.86558 | 0.00751 | -0.06058 | -0.04902 |
| (I <sub>3</sub> P)Ag(PI <sub>3</sub> ) <sup>+</sup> (C <sub>2h</sub> )                  | -896.16867   | 0.00790 | -0.05611 | -0.05262 |
| (Br <sub>3</sub> P)Ag(PBr <sub>3</sub> ) <sup>+</sup> (C <sub>2h</sub> )                | -16263.70295 | 0.00966 | -0.05817 | -0.04505 |
| (I <sub>3</sub> As)Ag(I <sub>2</sub> AsI) <sup>+</sup> (C <sub>1</sub> )                | -4683.34815  | 0.00568 | -0.05777 | -0.05803 |
| (Br <sub>3</sub> As)Ag(Br <sub>2</sub> AsBr) <sup>+</sup> (C <sub>1</sub> )             | -20050.87359 | 0.00700 | -0.06177 | -0.05290 |
| (I <sub>3</sub> P)Ag(I <sub>2</sub> PI) <sup>+</sup> (C <sub>1</sub> )                  | -896.16348   | 0.00741 | -0.05705 | -0.05431 |
| (Br <sub>3</sub> P)Ag(Br <sub>2</sub> PBr) <sup>+</sup> (C <sub>1</sub> )               | -16263.69562 | 0.00884 | -0.05925 | -0.05276 |
| (I <sub>3</sub> As)Ag(CH <sub>2</sub> Cl <sub>2</sub> ) <sup>+</sup> (C <sub>1</sub> )  | -3373.43618  | 0.03372 | -0.06345 | -0.02289 |
| (Br <sub>3</sub> As)Ag(CH <sub>2</sub> Cl <sub>2</sub> ) <sup>+</sup> (C <sub>1</sub> ) | -11057.19895 | 0.03451 | -0.06526 | -0.01915 |
| (I <sub>3</sub> P)Ag(CH <sub>2</sub> Cl <sub>2</sub> ) <sup>+</sup> (C <sub>1</sub> )   | -1479.84946  | 0.03467 | -0.06213 | -0.02088 |
| (Br <sub>3</sub> P)Ag(CH <sub>2</sub> Cl <sub>2</sub> ) <sup>+</sup> (C <sub>1</sub> )  | -9163.61733  | 0.03559 | -0.06294 | -0.01704 |
| (I <sub>3</sub> As)(I <sub>2</sub> )Ag <sup>+</sup> (C <sub>s</sub> )                   | -2437.46516  | 0.00400 | -0.06000 | -0.05083 |
| (Br <sub>3</sub> P)(Br <sub>2</sub> )Ag <sup>+</sup> (C <sub>s</sub> )                  | -13350.14656 | 0.00652 | -0.06281 | -0.04429 |
| (I <sub>3</sub> P)(I <sub>2</sub> )Ag <sup>+</sup> (C <sub>s</sub> )                    | -543.88068   | 0.00504 | -0.05968 | -0.04873 |
| (Br <sub>3</sub> As)(Br <sub>2</sub> )Ag <sup>+</sup> (C <sub>s</sub> )                 | -15243.71845 | 0.00521 | -0.06060 | -0.04544 |
| (I <sub>3</sub> P)Ag(I <sub>2</sub> ) <sup>+</sup> (C <sub>1</sub> )                    | -543.88960   | 0.00501 | -0.06103 | -0.04924 |
| (Br <sub>3</sub> P)Ag(Br <sub>2</sub> ) <sup>+</sup> (C <sub>1</sub> )                  | -13350.13710 | 0.00621 | -0.06321 | -0.04340 |
| (I <sub>3</sub> As)Ag(I <sub>2</sub> ) <sup>+</sup> (C <sub>1</sub> )                   | -2437.47608  | 0.00403 | -0.06136 | -0.05142 |
| (Br <sub>3</sub> As)Ag(Br <sub>2</sub> ) <sup>+</sup> (C <sub>1</sub> )                 | -15243.71831 | 0.00513 | -0.06538 | -0.04544 |
| (P <sub>4</sub> )Ag(Br <sub>2</sub> AsBr) <sup>+</sup> (C <sub>s</sub> )                | -11462.22182 | 0.01039 | -0.05967 | -0.04401 |
| Ag(P <sub>4</sub> ) <sub>2</sub> <sup>+</sup> (D <sub>2h</sub> )                        | -2873.56265  | 0.01403 | -0.05940 | -0.03253 |
| Ag(I <sub>2</sub> ) <sub>2</sub> <sup>+</sup> (C <sub>2h</sub> )                        | -191.60812   | 0.00254 | -0.06588 | -0.04342 |
| Ag(Br <sub>2</sub> ) <sub>2</sub> <sup>+</sup> (C <sub>2h</sub> )                       | -10436.56854 | 0.00254 | -0.06890 | -0.04342 |

### Ag(X<sub>2</sub>)<sup>+</sup> Energies and structures (X = Br, I; MP2/TZVPP)

|                                                 | U           | ZPE       | H(0K)       | E(rel)<br>(kJ/mol) |
|-------------------------------------------------|-------------|-----------|-------------|--------------------|
| <b>plan.90grad AgBr<sub>2</sub><sup>+</sup></b> | -5291.39275 | 0.001189  | -5291.39156 | 0                  |
| <b>plan.90grad AgI<sub>2</sub><sup>+</sup></b>  | -168.912853 | 0.0009276 | -168.911925 | 0                  |
| <b>cycle AgBr<sub>2</sub><sup>+</sup></b>       | -5291.39143 | 0.0010611 | -5291.39036 | +3.13              |
| <b>cycle AgI<sub>2</sub><sup>+</sup></b>        | -168.912452 | 0.000854  | -168.911598 | +0.86              |
| <b>* linear AgBr<sub>2</sub><sup>+</sup></b>    | -5291.36826 | 0.0009651 | -5291.36729 | +63.71             |
| <b>* linear AgI<sub>2</sub><sup>+</sup></b>     | -168.881567 | 0.0007277 | -168.880839 | +81.62             |
| <b>* 2 imaginary Frequencies</b>                |             |           |             |                    |

**Optimized  $\text{Ag}(\text{X}_2)^+$  structures at the MP2/TZVPP level (X = Br, I):**

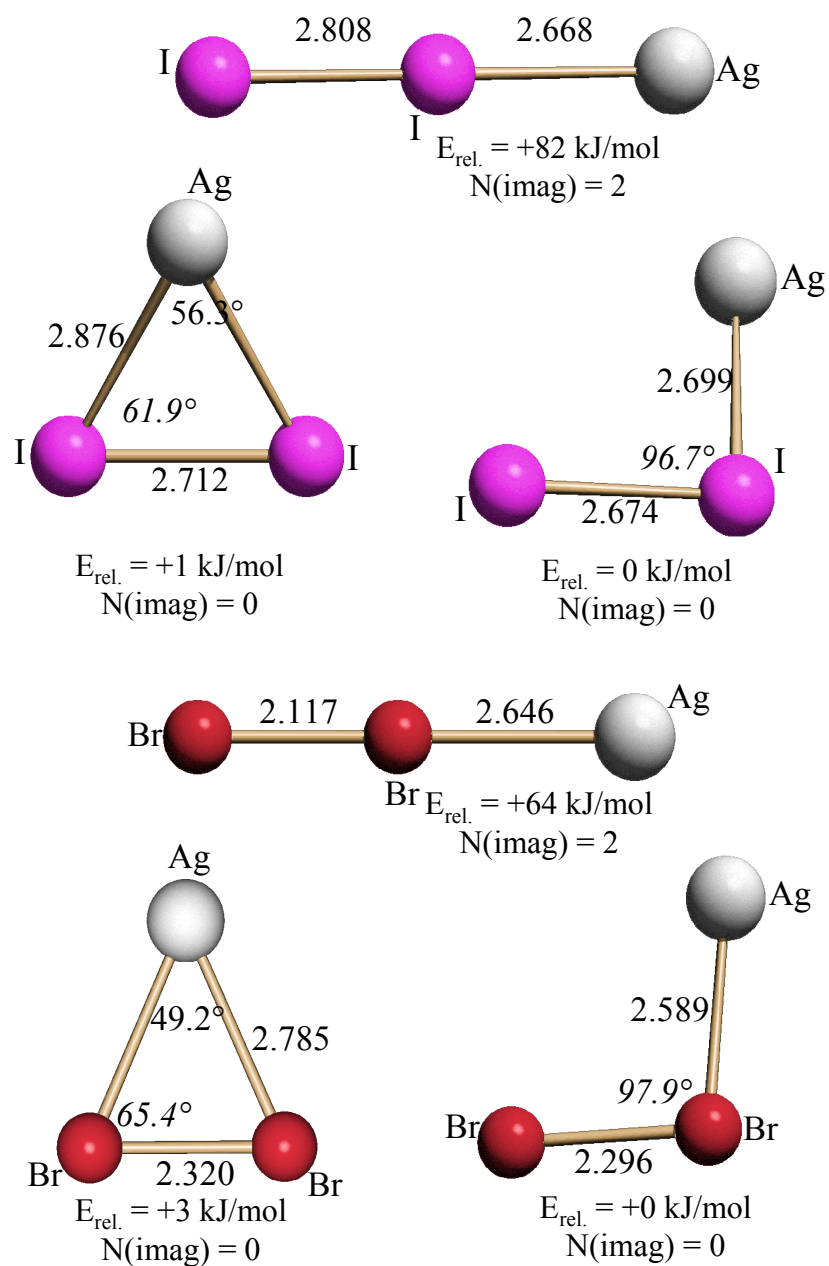

### Deposited Born Haber Cycles and Auxiliary Data

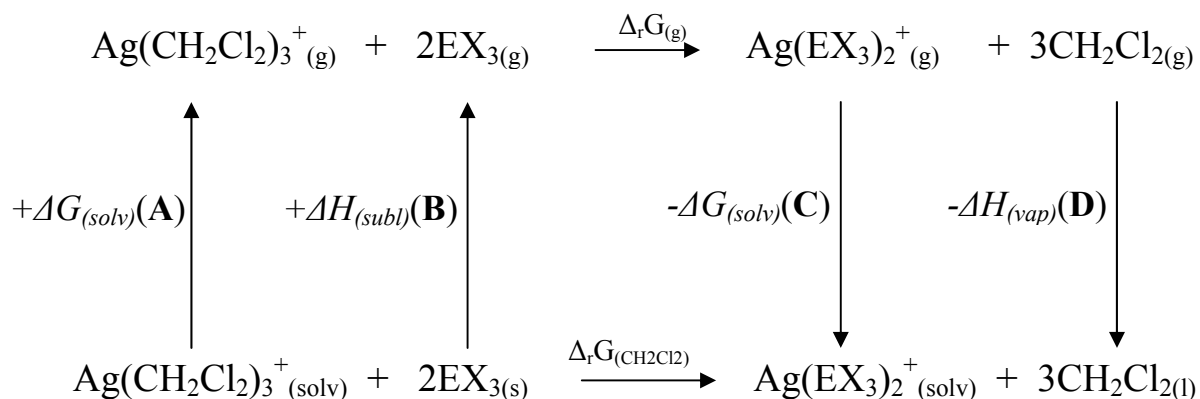

Fig. A. The Born-Haber cycle for the formation of the  $\text{Ag}(\text{EX}_3)_2^+$  complexes in solution for E = As, P and X = Br, I. The general formula  $\text{Ag}(\text{EX}_3)_2^+$  denotes here the most favorable isomer:  $(\text{I}_3\text{P})\text{Ag}(\text{PI}_3)^+$ ,  $(\text{BrPBr}_2)\text{Ag}(\text{PBr}_3)^+$  and for E = As and X = Br, I it is the  $(\text{XEX}_2)\text{Ag}(\text{X}_2\text{EX})^+$  isomer.

Tab. B. The enthalpies in the Born-Haber cycle (in  $\text{kJ}\cdot\text{mol}^{-1}$ ) of the formation of complexes  $\text{Ag}(\text{EX}_3)_2^+$  in the reaction  $\text{Ag}(\text{CH}_2\text{Cl}_2)_3^+ + 2\text{EX}_3 \rightarrow \text{Ag}(\text{EX}_3)_2^+ + 3\text{CH}_2\text{Cl}_2$  (X = Br, I; E = As, P). The letters A-D denotes  $\Delta G$  or  $\Delta H$  for the processes of solvation, sublimation or evaporation in the Fig. A.

| E, X   | A    | B    | C                       | D   | $\Delta_r G(\text{g})$ | $\Delta G^{298\text{K}}_{(\text{CH}_2\text{Cl}_2)}$ |
|--------|------|------|-------------------------|-----|------------------------|-----------------------------------------------------|
| As, Br | +158 | +84  | -158                    | -87 | -26                    | -29                                                 |
| As, I  | +158 | +119 | -149                    | -87 | -64                    | -23                                                 |
| P, Br  | +158 | +78  | -155                    | -87 | -35                    | -41                                                 |
| P, I   | +158 | +88  | -147/-150 <sup>b)</sup> | -87 | -70/-63 <sup>b)</sup>  | -58/-53 <sup>a)</sup>                               |

<sup>a)</sup> values calculated for the  $(\text{I}_3\text{P})\text{Ag}(\text{I}_2\text{PI})^+$  isomer.

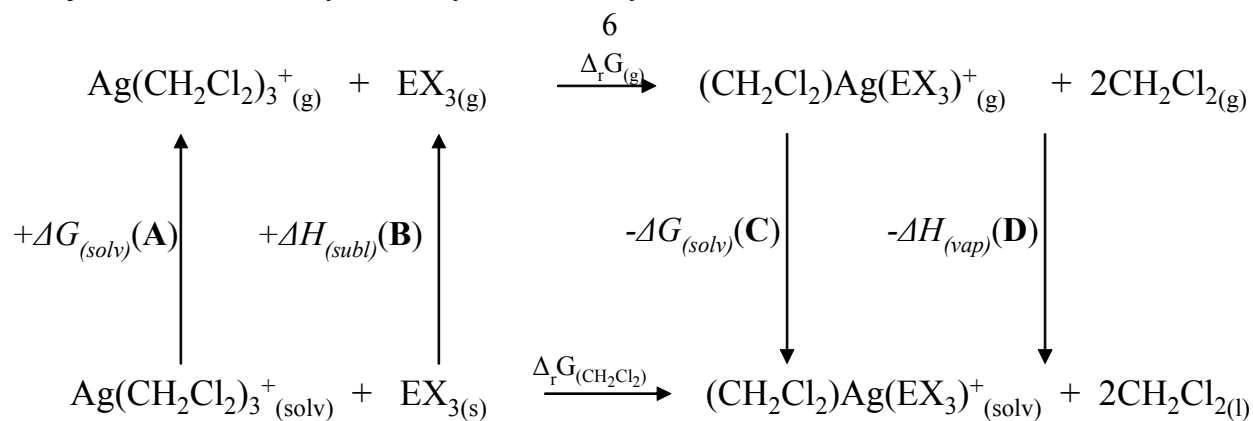

Fig. B. The Born-Haber cycle for the formation in solution of the following complexes:  $(\text{CH}_2\text{Cl}_2)\text{Ag}(\text{X}_2\text{EX})^+$  for  $\text{E} = \text{As}$ ;  $\text{X} = \text{Br}, \text{I}$  and  $(\text{CH}_2\text{Cl}_2)\text{Ag}(\text{EX}_3)^+$  (for  $\text{E} = \text{P}$ ;  $\text{X} = \text{Br}, \text{I}$ ). The general formula  $\text{Ag}(\text{EX}_3)_2^+$  denotes here the most favorable isomer and does not express the appropriate geometry.

Tab. C. The enthalpies in the Born-Haber cycle (in  $\text{kJ}\cdot\text{mol}^{-1}$ ) of the formation of complexes  $(\text{CH}_2\text{Cl}_2)\text{Ag}(\text{EX}_3)^+$  in the reaction  $\text{Ag}(\text{CH}_2\text{Cl}_2)_3^+ + \text{EX}_3 \rightarrow (\text{CH}_2\text{Cl}_2)\text{Ag}(\text{EX}_3)^+ + 2\text{CH}_2\text{Cl}_2$  ( $X = \text{Br}, \text{I}$ ;  $\text{E} = \text{As}, \text{P}$ ). The letters A-D denotes  $\Delta G$  or  $\Delta H$  for the processes of sublimation, solvation or evaporation in the Fig. B.

| <b>E, X</b> | <b>A</b> | <b>B</b> | <b>C</b> | <b>D</b> | $\Delta_r G(\text{g})$ | $\Delta G^{298\text{K}}_{(\text{CH}_2\text{Cl}_2)}$ |
|-------------|----------|----------|----------|----------|------------------------|-----------------------------------------------------|
| As, Br      | +158     | +42      | -165     | -58      | +3                     | -20                                                 |
| As, I       | +158     | +59      | -160     | -58      | -22                    | -23                                                 |
| P, Br       | +158     | +39      | -165     | -58      | -6                     | -32                                                 |
| P, I        | +158     | +44      | -163     | -58      | -23                    | -42                                                 |

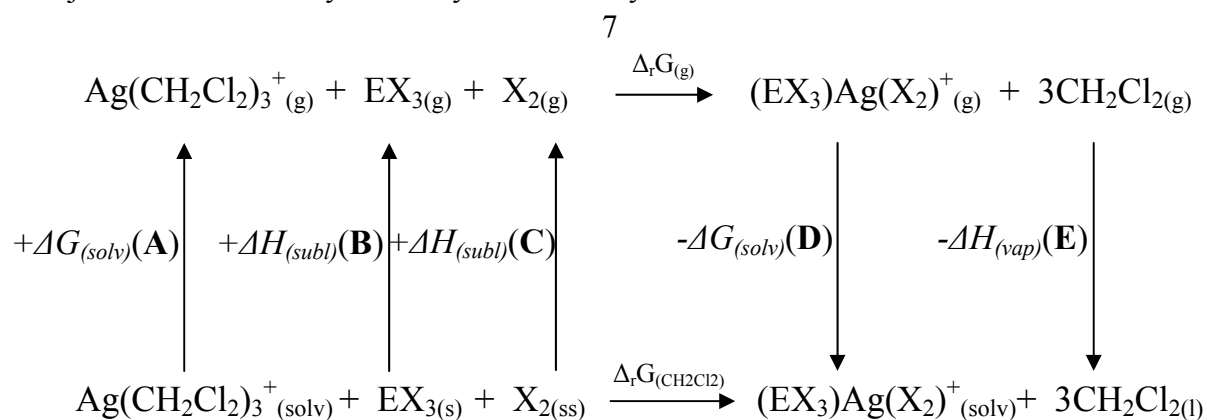

Fig. C. The Born-Haber cycle for the formation of the  $(\text{EX}_3)\text{Ag}(\text{X}_2)^+$  complexes in solution for  $E = \text{As}, \text{P}$  and  $X = \text{Br}, \text{I}$ . The general complex formula  $(\text{EX}_3)\text{Ag}(\text{X}_2)^+$  denotes different types of coordination. For every complex the most favorable geometry was taken.

Tab. D. The enthalpies for the formation of the most favorable complexes of type  $(\text{EX}_3)\text{Ag}(\text{X}_2)^+$  in the reaction  $\text{Ag}(\text{CH}_2\text{Cl}_2)_3^+ + \text{EX}_3 + \text{X}_2 \rightarrow (\text{EX}_3)\text{Ag}(\text{X}_2)^+ + 3\text{CH}_2\text{Cl}_2$  ( $X = \text{Br}, \text{I}; E = \text{As}, \text{P}$ ) in the Born-Haber cycle (in  $\text{kJ}\cdot\text{mol}^{-1}$ ). The letters A-D denotes  $\Delta G$  or  $\Delta H$  for the processes of solvation, sublimation or evaporation in the Fig. C.

| Type of $(\text{EX}_3)\text{Ag}(\text{X}_2)^+$ isomer formed | A    | B   | C   | D    | E   | $\Delta_r G_{(g)}$ | $\Delta G^{298\text{K}}_{(\text{CH}_2\text{Cl}_2)}$ |
|--------------------------------------------------------------|------|-----|-----|------|-----|--------------------|-----------------------------------------------------|
| $(\text{BrAsBr}_2)\text{Ag}(\text{Br})_2^+$                  | +158 | +42 | +31 | -167 | -87 | +6                 | -17                                                 |
| $(\text{I}_3\text{As})\text{Ag}(\text{I})_2^+$               | +158 | +59 | +63 | -161 | -87 | -22                | +10                                                 |
| $(\text{Br}_3\text{P})(\text{Br}_2)\text{Ag}^+$              | +158 | +39 | +31 | -165 | -87 | -22                | -46                                                 |
| $(\text{I}_3\text{P})\text{Ag}(\text{I})_2^+$                | +158 | +44 | +63 | -160 | -87 | -41                | -23                                                 |
